# Supplementary material for: Analysis-Ready Data from Hyperspectral Sensors—The Design of the EnMAP CARD4L-SR Data Product
Source: MDPI journal article supplement (doi:10.3390/rs13224536), 2021-11-11
Supplement: s1 [file s1]

Archive with 1 entries (1 files):
- remotesensing-1422089-supplementary.pdf
